# Supplementary material for: Bridged-cyclodextrin supramolecular hydrogels: host–guest interaction between a cyclodextrin dimer and adamantyl substituted poly(acrylate)s
Source: Royal Society of Chemistry journal article supplement (doi:10.1039/c5ra06163f), 2015-01-01
Supplement: c5ra06163f1.pdf [file c5ra06163f1.pdf]

## Supporting Information

# **Bridged-Cyclodextrin Supramolecular Hydrogels: Host-Guest Interaction Between Cyclodextrin Dimer and Adamantyl Substituted Poly(acrylate)s**

Jie Wang<sup>1</sup>, Yisheng Xu<sup>1\*</sup>, Yiming Wang<sup>2</sup>, Jianjia Liu<sup>2</sup>, Jun Xu<sup>2</sup>, Li Li<sup>2</sup>, Hanh-Trang Nguyen<sup>3</sup>,  
Duc-Truc Pham<sup>3</sup>, Stephen F. Lincoln<sup>3</sup>, Xuhong Guo<sup>2\*</sup>

<sup>1</sup>Shanghai Key Laboratory of Multiphase Materials Chemical Engineering, East China University of Science and Technology, Shanghai 200237, China

<sup>2</sup>State Key Laboratory of Chemical Engineering, East China University of Science and Technology, Shanghai 200237, China

<sup>3</sup>School of Chemistry and Physics, University of Adelaide, Adelaide, SA 5005, Australia

\*To whom correspondence should be addressed. E-mail: yshxu@ecust.edu.cn (Yisheng Xu),  
guoxuhong@ecust.edu.cn (Xuhong Guo)

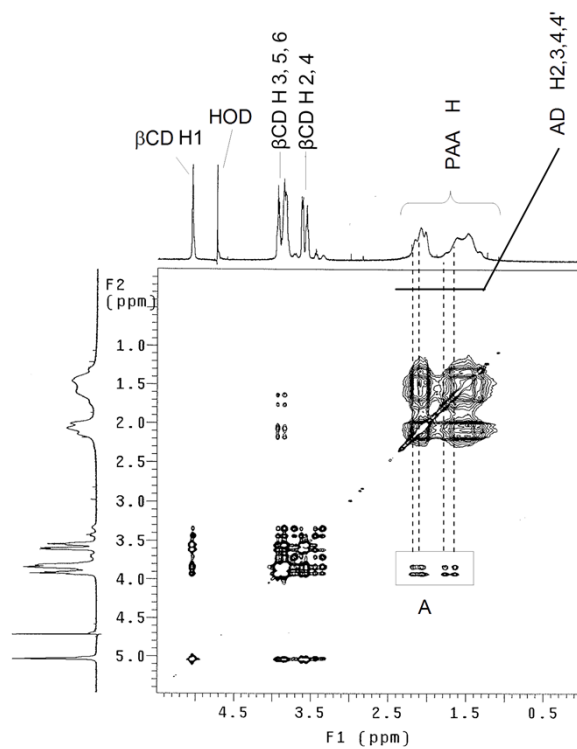

**Figure S1.** 2D  $^1\text{H}$  NOESY NMR spectrum of PAAAD and  $\beta\text{CD}_2\text{ur}$  with equimolar  $\beta\text{CD}$  groups and adamantyl substituents. The cross-peaks enclosed in rectangle A arise from interactions of the AD substituent  $\text{H}^{2-4}$  with the annular  $\text{H}^{3,5,6}$  of  $\beta\text{CD}_2\text{ur}$ .

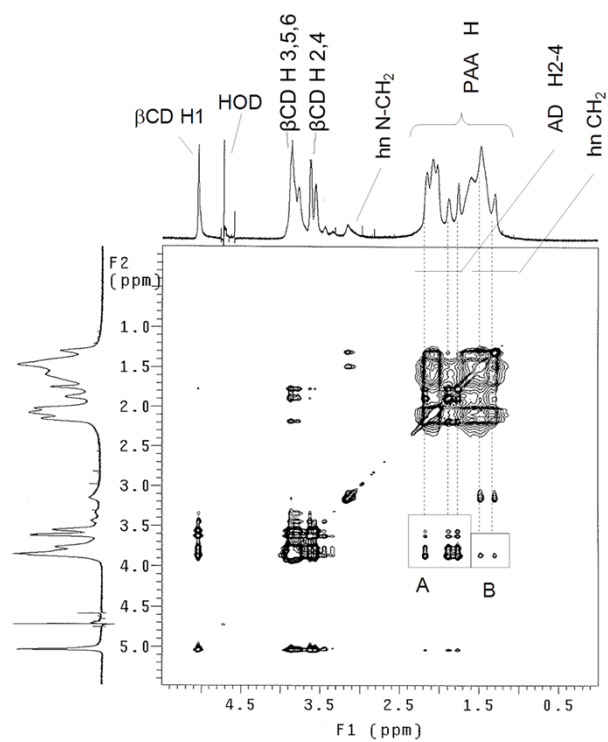

**Figure S2.** 2D  $^1\text{H}$  NOESY NMR spectrum of PAAADhn and  $\beta\text{CD}_2\text{ur}$  with equimolar  $\beta\text{CD}$  groups and adamantyl substituents. The cross-peaks enclosed in rectangles A and B arise from interactions of the AD substituent  $\text{H}^{2-4}$  and hexyl tether protons with the annular  $\text{H}^{3,5,6}$  of  $\beta\text{CD}_2\text{ur}$ , respectively.

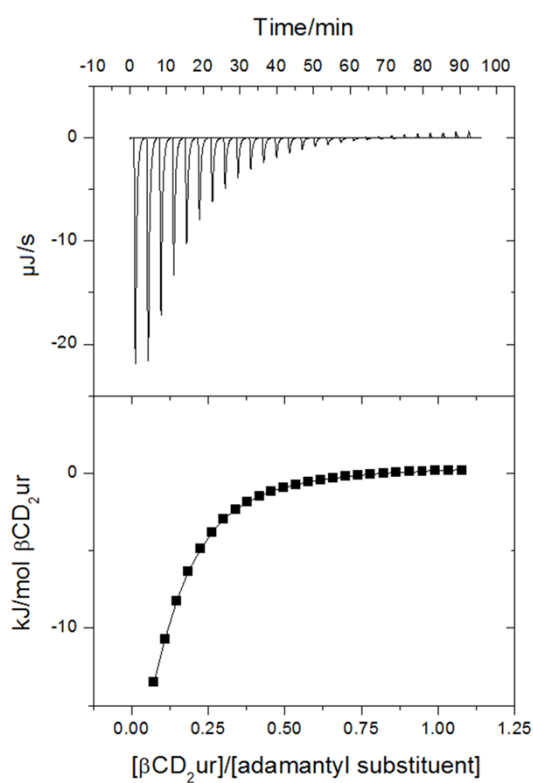

**Figure S3.** Top. ITC data for the  $\beta\text{CD}_2\text{ur}$  /PAAAD system where  $6.54 \times 10^{-3} \text{ mol dm}^{-3}$   $\beta\text{CD}_2\text{ur}$  was titrated into 0.4 wt. % PAAAD for which the  $[\text{adamantyl substituent}] = 1.22 \times 10^{-3} \text{ mol dm}^{-3}$  in aqueous phosphate buffer at pH 7.0 and  $I = 0.10 \text{ mol dm}^{-3}$  at 298.2 K. Bottom. The solid curve shows the best fit to the experimental data points of an algorithm for equilibrium analogous for the interaction of the  $\beta\text{CD}$  with the adamantyl substituent.

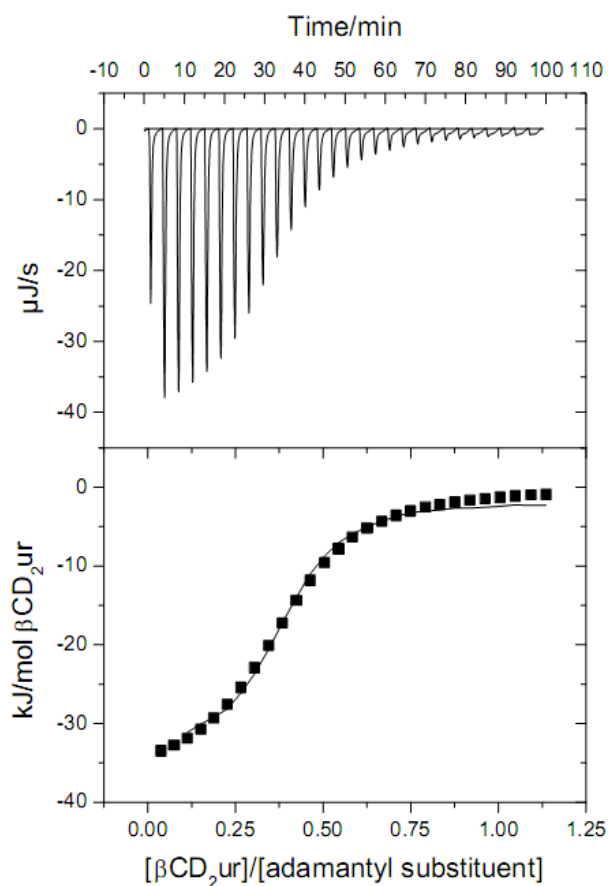

**Figure S4.** Top. ITC data for the  $\beta\text{CD}_2\text{ur}$  /PAAADddn system where  $3.27 \times 10^{-3} \text{ mol dm}^{-3}$   $\beta\text{CD}_2\text{ur}$  was titrated into 0.2 wt. % PAAADddn for which the  $[\text{adamantyl substituent}] = 0.59 \times 10^{-3} \text{ mol dm}^{-3}$  in aqueous phosphate buffer at pH 7.0 and  $I = 0.10 \text{ mol dm}^{-3}$  at 298.2 K. Bottom. The solid curve shows the best fit to the experimental data points of an algorithm for equilibrium analogous for the interaction of the  $\beta\text{CD}$  with the adamantyl substituent.
